# Supplementary material for: Improving equity by removing healthcare fees for children in Burkina Faso
Source: PubMed Central journal article supplement — J Epidemiol Community Health. 2013 Jun 17;67(9):751–7. doi: 10.1136/jech-2012-202080 (PMC3756435; doi:10.1136/jech-2012-202080), 2013-06-17
Supplement: jech-2012-202080-s1.pdf [file jech-2012-202080-s1.pdf]

Web Appendix 1

Effects of the intervention on the number of consultations per day

xtmepoisson cg t iv##r d2##c.t##r m2-m12, offset(ln\_pop0a4) ||d: ||f: t iv, cov (ind) laplace irr diff

Mixed-effects Poisson regression Number of obs = 73903

| Group Variable | No. of Groups | Observations per Group Minimum | Average | Maximum | Integration Points |
|----------------|---------------|--------------------------------|---------|---------|--------------------|
| d              | 2             | 26574                          | 36951.5 | 47329   | 1                  |
| f              | 18            | 2046                           | 4105.7  | 6192    | 1                  |

Log likelihood = -125148.2 Wald chi2(25) = 21777.36  
 Prob > chi2 = 0.0000

| cg        | IRR      | Std. Err. | z      | P> z  | [95% Conf. Interval] |
|-----------|----------|-----------|--------|-------|----------------------|
| t         | 1.109354 | .0532491  | 2.16   | 0.031 | 1.009747 1.218788    |
| 1.iv      | 2.205051 | .2664053  | 6.55   | 0.000 | 1.740123 2.7942      |
| r         |          |           |        |       |                      |
| 2         | .5316859 | .0305466  | -11.00 | 0.000 | .4750635 .5950571    |
| 3         | .3523849 | .0155439  | -23.65 | 0.000 | .3231992 .3842062    |
| iv##r     |          |           |        |       |                      |
| 1 2       | 1.103811 | .0324753  | 3.36   | 0.001 | 1.041961 1.169333    |
| 1 3       | .8004348 | .0202385  | -8.80  | 0.000 | .761735 .8411008     |
| 1.d2      | 1.015321 | .2977075  | 0.05   | 0.959 | .5715029 1.803801    |
| t         | 1        | (omitted) |        |       |                      |
| d2#c.t    |          |           |        |       |                      |
| 1         | 1.116764 | .066044   | 1.87   | 0.062 | .9945406 1.254008    |
| d2#r      |          |           |        |       |                      |
| 1 2       | .8915344 | .0616574  | -1.66  | 0.097 | .7785205 1.020954    |
| 1 3       | 1.296193 | .0706123  | 4.76   | 0.000 | 1.164928 1.442249    |
| r#c.t     |          |           |        |       |                      |
| 2         | .9562873 | .0143523  | -2.98  | 0.003 | .9285669 .9848352    |
| 3         | 1.056793 | .0123499  | 4.73   | 0.000 | 1.032862 1.081277    |
| d2#r#c.t  |          |           |        |       |                      |
| 1 2       | 1.115845 | .0210368  | 5.81   | 0.000 | 1.075366 1.157848    |
| 1 3       | .9730412 | .014706   | -1.81  | 0.071 | .9446408 1.002296    |
| m2        | .8788478 | .013971   | -8.12  | 0.000 | .8518872 .9066616    |
| m3        | .8161405 | .0127302  | -13.03 | 0.000 | .7915673 .8414766    |
| m4        | .9003017 | .0136637  | -6.92  | 0.000 | .8739158 .9274842    |
| m5        | .8037542 | .0124304  | -14.13 | 0.000 | .7797566 .8284903    |
| m6        | .6812331 | .0110952  | -23.57 | 0.000 | .6598304 .70333      |
| m7        | .73869   | .0116943  | -19.13 | 0.000 | .7161215 .7619697    |
| m8        | 1.299177 | .0181242  | 18.76  | 0.000 | 1.264135 1.33519     |
| m9        | 1.717171 | .0240293  | 38.64  | 0.000 | 1.670714 1.764919    |
| m10       | 1.483717 | .0209269  | 27.97  | 0.000 | 1.443263 1.525305    |
| m11       | 1.014471 | .0155845  | 0.94   | 0.350 | .9843807 1.04548     |
| m12       | 1.01932  | .0154663  | 1.26   | 0.207 | .9894534 1.050089    |
| _cons     | .0008395 | .0002006  | -29.64 | 0.000 | .0005256 .001341     |
| ln_pop0a4 | 1        | (offset)  |        |       |                      |

| Random-effects Parameters | Estimate | Std. Err. | [95% Conf. Interval] |
|---------------------------|----------|-----------|----------------------|
| d: Identity               |          |           |                      |
| sd(_cons)                 | .0000281 | .1379734  | 0 .                  |
| f: Independent            |          |           |                      |
| sd(t)                     | .1158854 | .0198301  | .0828653 .1620634    |
| sd(iv)                    | .4135431 | .0857599  | .2754228 .6209285    |

```
sd(_cons) | .579842 .098583 .415519 .8091489
-----
LR test vs. Poisson regression:   chi2(4) = 13744.09   Prob > chi2 = 0.0000
```
