# Supplementary material for: Improving equity by removing healthcare fees for children in Burkina Faso
Source: PubMed Central journal article supplement — J Epidemiol Community Health. 2013 Jun 17;67(9):751–7. doi: 10.1136/jech-2012-202080 (PMC3756435; doi:10.1136/jech-2012-202080), 2013-06-17
Supplement: jech-2012-202080-s2.pdf [file jech-2012-202080-s2.pdf]

**Web Appendix 2**

**Effects of the intervention on the utilisation of health centres by sick children**

**MODEL :** poisson uc i.iv##i.poor i.iv##i.r5 i.iv##viemenpos i.iv##viemenpos##i.poor##i.r5 age  
if d2==2, vce(cluster idcompz) irr

Poisson regression Number of obs = 545  
Wald chi2(16) = 203.57  
Prob > chi2 = 0.0000  
Log pseudolikelihood = -415.90119 Pseudo R2 = 0.0406

(Std. Err. adjusted for 48 clusters in idcompz)

| uc                   | IRR      | Robust<br>Std. Err. | z     | P> z  | [95% Conf. Interval] |          |
|----------------------|----------|---------------------|-------|-------|----------------------|----------|
| 1.iv                 | 1.89826  | .4172043            | 2.92  | 0.004 | 1.23389              | 2.92035  |
| 1.poor               | 1.306345 | .344862             | 1.01  | 0.311 | .7786628             | 2.191627 |
| iv#poor              |          |                     |       |       |                      |          |
| 1 1                  | .4594541 | .1911547            | -1.87 | 0.062 | .2032833             | 1.038442 |
| 1.r5                 | .7988148 | .1869447            | -0.96 | 0.337 | .5049419             | 1.26372  |
| iv#r5                |          |                     |       |       |                      |          |
| 1 1                  | .8698354 | .2378902            | -0.51 | 0.610 | .5089124             | 1.486727 |
| 1.viemenpos          | .961998  | .3152036            | -0.12 | 0.906 | .5061434             | 1.828415 |
| iv#viemenpos         |          |                     |       |       |                      |          |
| 1 1                  | 1.174647 | .4930693            | 0.38  | 0.701 | .5159499             | 2.674283 |
| viemenpos#poor       |          |                     |       |       |                      |          |
| 1 1                  | .2359759 | .2216146            | -1.54 | 0.124 | .0374515             | 1.486846 |
| iv#viemenpos#poor    |          |                     |       |       |                      |          |
| 1 1 1                | 5.104779 | 5.385925            | 1.55  | 0.122 | .6454989             | 40.36997 |
| viemenpos#r5         |          |                     |       |       |                      |          |
| 1 1                  | 1.302739 | .5494777            | 0.63  | 0.531 | .5699438             | 2.977712 |
| iv#viemenpos#r5      |          |                     |       |       |                      |          |
| 1 1 1                | .8045939 | .4556236            | -0.38 | 0.701 | .2651919             | 2.441143 |
| poor#r5              |          |                     |       |       |                      |          |
| 1 1                  | .5856614 | .217522             | -1.44 | 0.150 | .2828132             | 1.212812 |
| iv#poor#r5           |          |                     |       |       |                      |          |
| 1 1 1                | 1.521628 | .838335             | 0.76  | 0.446 | .5168236             | 4.479965 |
| viemenpos#poor#r5    |          |                     |       |       |                      |          |
| 1 1 1                | 9.973995 | 10.08546            | 2.27  | 0.023 | 1.374533             | 72.37412 |
| iv#viemenpos#poor#r5 |          |                     |       |       |                      |          |
| 1 1 1 1              | .2295088 | .2663034            | -1.27 | 0.205 | .0236121             | 2.230819 |
| age                  | .9557391 | .0362664            | -1.19 | 0.233 | .8872373             | 1.02953  |
| _cons                | .4117497 | .0800479            | -4.56 | 0.000 | .2812885             | .6027187 |
